# Supplementary material for: A paralogous pair of mammalian host restriction factors form a critical host barrier against poxvirus infection
Source: PubMed Central journal article supplement (PMC5831749; doi:10.1371/journal.ppat.1006884), 2018-02-15

**A**

|                    |     |                            |            |
|--------------------|-----|----------------------------|------------|
|                    |     | I R E F R F V              |            |
| mSAMD9L            | 837 | 5'-TATCCGGGAACCACGGTTCG    | TGG-3' 862 |
| guide#1            |     |                            |            |
|                    |     | TATCCGGGAACCACGGTTCG       | +1 5x      |
| $\Delta$ mSAMD9L#1 |     | TATCCGGGAACCACGGTTCG       | -9 4x      |
|                    |     | TATCCGGGAACCACGGTTCG       | -7 3x      |
|                    |     | TATCCGGGAACCACGGTTCG       | -2 2x      |
|                    |     |                            |            |
|                    |     | P H G E I V G V            |            |
| mSAMD9L            | 722 | 5'-CCACACGGGGAAATTGTTGGTGT | -3' 743    |
| guide#2            |     | 3'-GGTGTGCCCTTTAACACCACA   | -5'        |
|                    |     | CCACACGGGGAAATTGTTGGTGT    | +1 18x     |
| $\Delta$ mSAMD9L#2 |     | CCACACGGGGAAATTGTTGGTGT    | -8 2x      |

**B**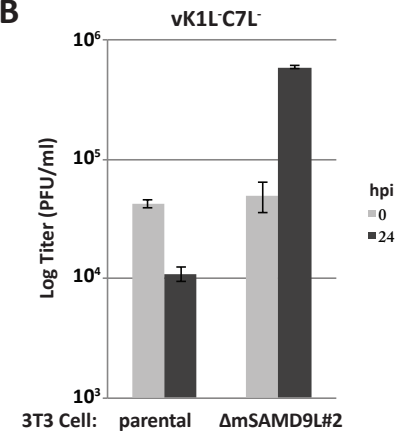

Supplement: ppat.1006884.s001.pdf [file ppat.1006884.s001.pdf]
