# Supplementary material for: A paralogous pair of mammalian host restriction factors form a critical host barrier against poxvirus infection
Source: PubMed Central journal article supplement (PMC5831749; doi:10.1371/journal.ppat.1006884), 2018-02-15
Supplement: ppat.1006884.s002.pdf [file ppat.1006884.s002.pdf]

**A**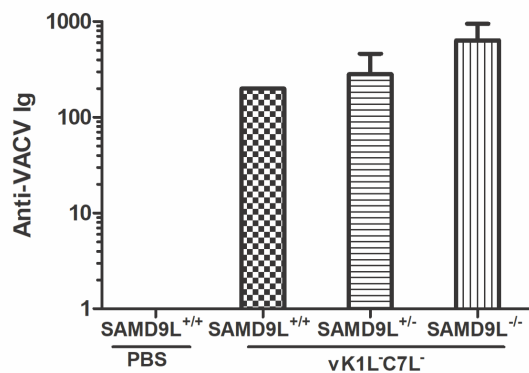**B**

| Virus                              | Mouse                     | Viral titer in Lung (PFU/5 mg tissue) | Viral titer in spleen (PFU/16 mg tissue) |
|------------------------------------|---------------------------|---------------------------------------|------------------------------------------|
| WR                                 | SAMD9L <sup>-/-</sup> #1  | $1.9 \times 10^7$                     | $1.9 \times 10^3$                        |
| WR                                 | SAMD9L <sup>-/-</sup> #2  | $2.5 \times 10^7$                     | $2.8 \times 10^3$                        |
| vK1L <sup>-</sup> C7L <sup>-</sup> | SAMD9L <sup>+/+</sup> all | below detection (<10)                 | below detection (<10)                    |
| vK1L <sup>-</sup> C7L <sup>-</sup> | SAMD9L <sup>+/-</sup> all | below detection (<10)                 | below detection (<10)                    |
