# Supplementary material for: A paralogous pair of mammalian host restriction factors form a critical host barrier against poxvirus infection
Source: PubMed Central journal article supplement (PMC5831749; doi:10.1371/journal.ppat.1006884), 2018-02-15

**A**

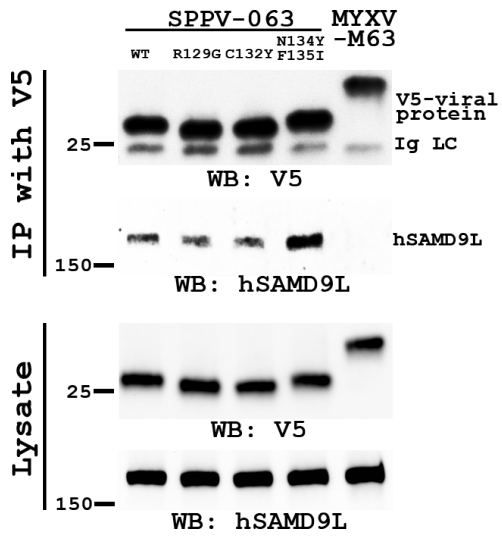

**B**

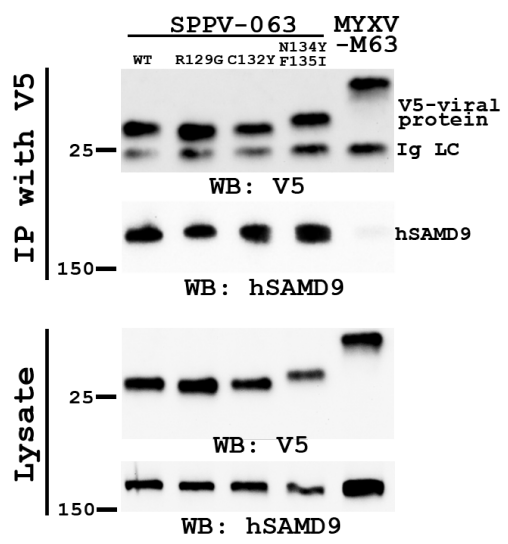

Supplement: ppat.1006884.s006.pdf [file ppat.1006884.s006.pdf]
